# Supplementary material for: Building large updatable colored de Bruijn graphs via merging
Source: PubMed Central journal article supplement — Bioinformatics. 2019 Jul 5;35(14):i51–60. doi: 10.1093/bioinformatics/btz350 (PMC6612864; doi:10.1093/bioinformatics/btz350), 2019-07-05
Supplement: btz350_supplementary_data.pdf [file btz350_supplementary_data.pdf]

## Supplement

### 7 Illustration of Succinct Colored de Bruijn Graph

Below we illustrate the succinct colored de Bruijn graph data structure that was presented by Muggli *et al.* (2017) and is used in this paper.

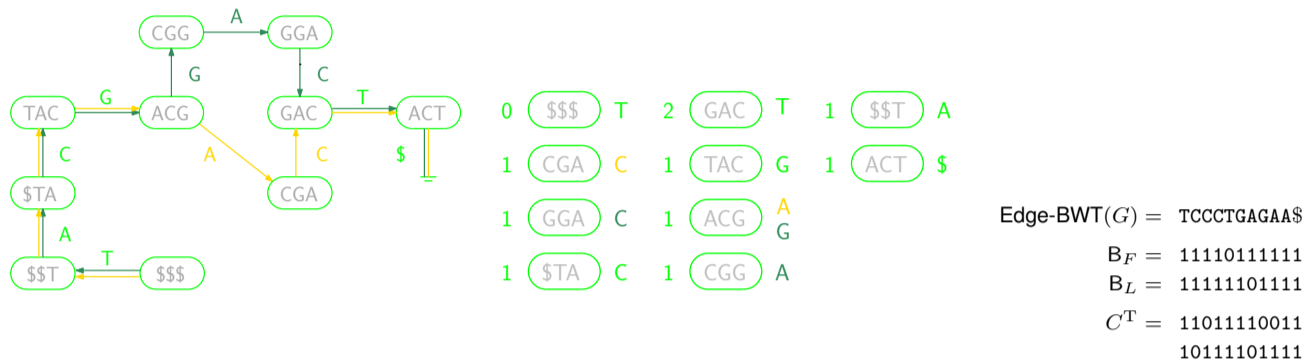

Fig. 2: **Left:** A colored de Bruijn graph consisting of two individual graphs, whose edges are shown in yellow and green. The nodes are present in either the yellow graph, the green graph, or both graphs and thus, are shown in lime. **Center:** The co-lexicographically sorted nodes, with the number of incoming edges shown on their left and the labels of the outgoing edges shown on their right. The edge labels are shown in yellow or green if the edges occur only in the respective graph, or lime if they occur in both. **Right:** The Vari representation of the colored de Bruijn graph: the edge-BWT is the list of edge labels.  $B_F$  and  $B_L$  are bit vectors to track the incoming and outgoing node degree, respectively. Finally, the binary array  $C$  (shown transposed) indicates which edges are present in which individual graphs.

### 8 $k$ -mer Recovery

If we know the range  $B_L[i..j]$  of  $k$ -mers whose starting nodes end with a pattern  $P$  of length less than  $(k - 1)$ , then we can compute the range  $B_F[i'..j']$  of  $k$ -mers whose ending nodes end with  $Pc$ , for any character  $c$ , as follows:

$$\begin{aligned}
 i' &= |\{d : d \in E, \text{label}(d) \prec c\}| \\
 &\quad + |\{h : \text{Edge-BWT}[h] = c, h < i\}| \\
 j' &= |\{d : d \in E, \text{label}(d) \prec c\}| \\
 &\quad + |\{h : \text{Edge-BWT}[h] = c, h \leq j\}| - 1.
 \end{aligned}$$

Thus, we can find the interval in  $B_L$  containing  $v$ 's outgoing edges in  $O(k \log \log \sigma)$ -time, provided there is a directed path to  $v$  of length at least  $k - 1$ . Thus, we add extra nodes and edges to the graph to ensure there is a directed path of length at least  $k - 1$  to each original node. More formally, we augment the graph so that each new node has a  $(k - 1)$ -mer that is prefixed by one or more copies of a special symbol  $\$$  not in the alphabet and lexicographically strictly less than all others. When new nodes are added, we are assured that the node with  $k$ -mer  $\$^{k-1}$  is always first in colex order and has no incoming edges. Lastly, we augment the graph in a similar manner by adding an extra outgoing edge, labeled  $\$$ , to each node with no outgoing edge.

### 9 Pseudocode for the Naive Merge Algorithm

Below is a detailed sketch of the naive merge algorithm.

---

**Algorithm 3** Naive Merge Algorithm. Because  $L_1$  and  $L_2$  are explicitly constructed, a large amount of memory is needed.

---

```

L1 ← ∅
L2 ← ∅
Populate L1 and L2 (See “ $k$ -mer Recovery” of Subsection 3)
Merge L1 and L2 into LM.
Create Edge-BWT( $G$ )M, BLM, BFM from LM
Create CM from C1 and C2

```

---

## 10 Illustration of merge plans

We provide an example of merge plans in two conceptual edge lists  $L_1$  and  $L_2$  from graphs  $G_1$  and  $G_2$  in Figure 3, where  $k = 4$ . As mentioned before the merge plan is defined as  $P_1 = \{[0, p_1^1], \dots, [p_i^1, |L_1| - 1]\}$  where each  $p_1^1, \dots, p_i^1$  is an index in  $L_1$ , and  $P_2 = \{[0, p_1^2], \dots, [p_i^2, |L_2| - 1]\}$ , where each  $p_1^2, \dots, p_i^2$  is an index in  $L_2$ . Next, all revisions of  $P_1$  and  $P_2$  are computed iteratively. In this example, we start with the red merge plans  $P_1$  and  $P_2$  covering the whole  $L_1$  and  $L_2$  respectively. In the next iteration, based on the next letter (the order is right to left), we revise every interval into at most five subintervals (five being the number of alphabets:  $\{\$, A, C, G, T\}$ ). In this example see how  $P_1$  and  $P_2$  in red are revised to  $P_1'$  and  $P_2'$  in green each with five intervals. Similarly, every interval in  $P_1'$  and  $P_2'$  are revised to at most five subintervals making  $P_1''$  and  $P_2''$ .

| $L_1$ |    |         |        |       | $L_2$ |    |         |        |       |
|-------|----|---------|--------|-------|-------|----|---------|--------|-------|
| $i$   |    | $P_1''$ | $P_1'$ | $P_1$ | $i$   |    | $P_2''$ | $P_2'$ | $P_2$ |
| 0     | \$ | \$      | \$     | T     | 0     | \$ | \$      | \$     | T     |
| 1     | C  | G       | A      | C     | 1     | C  | G       | A      | C     |
| 2     | \$ | T       | A      | C     | 2     | G  | G       | A      | C     |
| 3     | G  | A       | C      | G     | 3     | \$ | T       | A      | C     |
| 4     | G  | A       | C      | T     | 4     | G  | A       | C      | T     |
| 5     | T  | A       | C      | G     | 5     | T  | A       | C      | G     |
| 6     | C  | G       | C      | G     | 6     | A  | C       | G      | A     |
| 7     | G  | T       | C      | G     | 7     | A  | C       | G      | G     |
| 8     | A  | C       | G      | A     | 8     | C  | G       | G      | A     |
| 9     | A  | C       | G      | C     | 9     | \$ | \$      | T      | A     |
| 10    | A  | C       | G      | T     | 10    | A  | C       | T      | \$    |
| 11    | G  | C       | G      | A     |       |    |         |        |       |
| 12    | T  | C       | G      | A     |       |    |         |        |       |
| 13    | \$ | \$      | T      | A     |       |    |         |        |       |
| 14    | A  | C       | T      | \$    |       |    |         |        |       |
| 15    | C  | G       | T      | C     |       |    |         |        |       |

Fig. 3: Three merge plans. The initial merge plans are shown in red, where  $P_1$  is initialized  $\{[0, 15]\}$  and  $P_2$  is initialized to  $\{[0, 10]\}$ . Green is the first refinement of  $P_1$  and  $P_2$ . Thus,  $P_1'$  and  $P_2'$  consist of the continuous range of elements that have  $\$, A, C, G,$  and  $T$  in the next character position, e.g.  $P_1' = \{[0, 0], [1, 2], [3, 7], [8, 12], [13, 15]\}$  and  $P_2' = \{[0, 0], [1, 3], [4, 5], [6, 8], [9, 10]\}$ . Blue is the third merge plan which is based on the refinement of  $P_1'$  and  $P_2'$ .  $P_1''$  breaks each continuous range in  $P_1'$  into five (possibly empty) continuous ranges based on the next character position. For example, the first continuous range of  $P_1'$  is  $\{[0, 0]\}$  broken into five ranges in  $P_1''$ , e.g., one for  $\$, A, C, G,$  and  $T$ . Yet, four of these five ranges are empty since there exists only a single element with  $\$$  in the next character position.

## 11 Illustration of computing the next character of L

We provide an example of how we can navigate the set of edge  $k$ -mers without explicitly storing them. We compute the next character at each iteration with only three columns present in memory (shown with colors blue, red and orange).

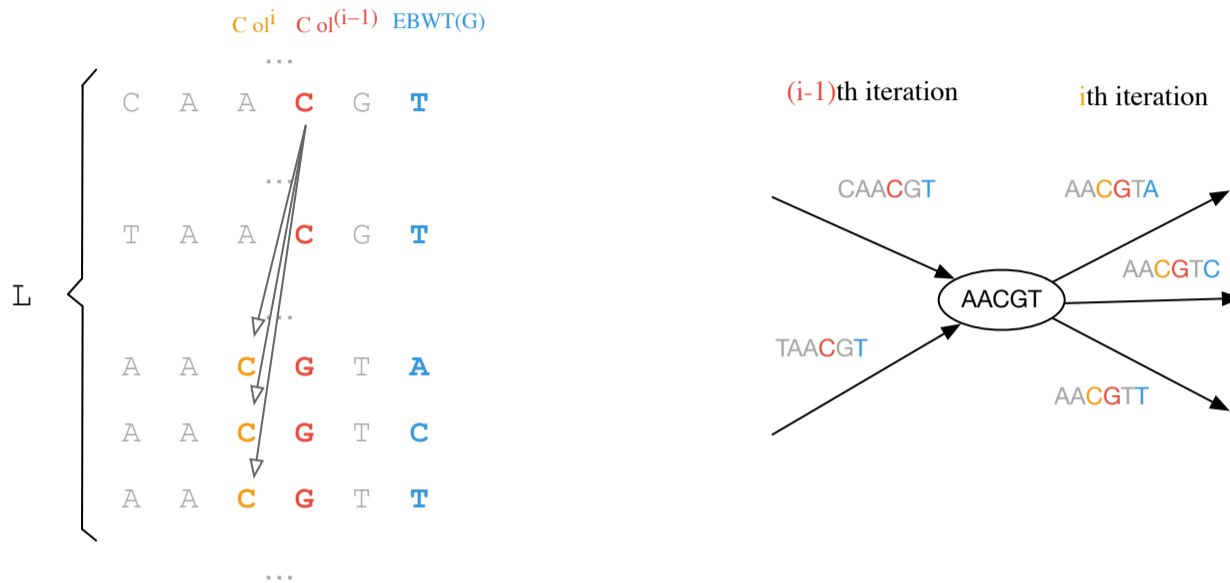

Fig. 4: Method for populating  $Col^i$  based on  $Col^{i-1}$  and graph navigation. Colored (blue, red and orange) nucleotides represent data that is in memory and valid. Grey represents data that is stored in external memory in Vari but is computed as needed and only exists ephemerally in VariMerge. Thus, only three columns are ever present in memory, which is a significant memory savings relative to the full set of edge  $k$ -mers. The three resident vectors are 1.)  $EBWT(G)$  (which is always present and used for navigation), 2.)  $Col^{i-1}$  which is already completely populated when a new column to the left, 3.)  $Col^i$  is being generated. As one can see in the associated graph representation on right, the successor edges have almost the same  $k$ -mer but shifted by one position. e.g. the red colored C in  $i-1$ -th iteration in position 4 is shifted to position 3 and turned into orange in  $i$ -th iteration.

### Algorithm 4 $GetCol(i, PrevCol, G)$

```

if  $i = k$  then
  return  $EBWT(G)$ 
else
  if  $i = 1$  then
     $PrevCol \leftarrow EBWT(G)$ 
  end if
   $ResultCol \leftarrow []$ 
  for all  $e \in \{1..|E|\}$  do
     $a \leftarrow \text{select}(\text{rank}(\{d : d \in E, \text{label}(d) \prec \text{label}(e)\} + 1, B_{L_1}) + r - 1, B_{L_1})$ 
     $b \leftarrow \text{select}(\text{rank}(\{d : d \in E, \text{label}(d) \prec \text{label}(e)\} + 1, B_{L_1}) + r, B_{L_1})$ 
    for all  $j \in \{a..b\}$  do
       $ResultCol[j] \leftarrow PrevCol[e]$ 
    end for
  end for
  return  $ResultCol$ 
end if

```

## 12 Merging the secondary components

*Delimiting common origin with  $B_{LM}$ .* We prepare to produce  $B_{LM}$  in the planning step by preserving a copy of the merge plan after  $k - 1$  refinement iterations as  $S_{k-1}$ . After  $k - 1$  refinement steps, our plan will demarcate a pair of edge sets where their  $k$ -mers have identical  $k - 1$  prefixes. Thus, whichever merged elements in  $\text{Edge-BWT}(G)_M$  result from those demarcated edges will also share the same  $k - 1$  prefix. Therefore, while executing the primary merge plan, we also consider the elements covered by  $S_{k-1}$  concurrently, advancing a pointer into  $\text{Edge-BWT}(G)_1$  or  $\text{Edge-BWT}(G)_2$  every time we merge elements from them. We form  $B_{LM}$  by appending a delimiting 1 to  $B_{LM}$  (again, indicating the final edge originating at a node) whenever both pointers reach the end of an equal rank pair of intervals in  $S_{k-1}$ 's lists.

*Delimiting common destination with  $\text{flags}_M$ .* We produce  $\text{flags}$  in a similar fashion to  $B_{LM}$  but create a temporary copy of  $S_{k-2}$  in the planning stage after  $k - 2$  refinement iterations instead of  $k - 1$ . In this case, the demarcated edges are not strictly those that share the same destination; only those edges that are demarcated and share the same final symbol. Thus, in addition to keeping pointers into  $\text{Edge-BWT}(G)_1$  or  $\text{Edge-BWT}(G)_2$ , we also maintain a vector of counters which contain the number of characters for each (final) symbol that have been emitted in the output. We reset all counters to 0 when a pair of delimiters in  $S_{k-2}$  is encountered. Then, when we append a symbol onto  $\text{Edge-BWT}(G)_M$ , we consult the counters to determine if it is the first edge in the demarcated range to end in that symbol. If so, we will not output a flag for the output symbol; otherwise, we will.

## 13 Proof of Theorem 1

**Theorem 1.** Given two colored de Bruijn graphs  $G_1 = (V_1, E_1)$  and  $G_2 = (V_2, E_2)$  constructed for  $k$  such that  $|E_1| \geq |E_2|$ . It follows that our merge algorithm constructs the merged colored de Bruijn graph  $G_M$  in  $O(|E_1| \cdot \max(k, t))$ -time, where  $t$  is the number of colors in  $G_M$ .

*Proof.* In our merge algorithm, we will perform  $k$  refinements of  $P_1$  and  $P_2$  after they are initialized. We know by definition and Observation 1 that  $|P_1| \leq |L_1|$ ,  $P_2 \leq |L_2|$ ,  $Col_1^i = |L_1| = |E_1|$  and  $Col_2^i = |L_2| \leq |E_1|$  at each iteration  $i$  of the algorithm. Further, it follows from Observation 1 that a constant number of operations are performed to  $P_1$ ,  $P_2$ ,  $Col_1^i$  and  $Col_2^i$ . Thus, the planning step will require  $O(|E_1|k)$ -time since there will  $k$  refinements of  $P_1$  and  $P_2$ , each of which has size at most  $|E_1|$ .

Executing the merge plan requires constructions of  $\text{Edge-BWT}$ ,  $B_F$ ,  $B_L$ , and  $C_M$  from the merge plan. Construction of  $\text{Edge-BWT}$ ,  $B_F$  and  $B_L$  requires  $O(|E_1|)$ -time since a constant number of operations are needed for each item of the merge plan and there are at most  $|E_1|$  items in  $P_1$  and  $P_2$ . Next, in order to construct  $C_M$ , we perform a constant number of operations for each element of  $C_M$ . Since  $C_M$  is a binary matrix of size  $2|E_1| \times t$  this will require  $O(|E_1|t)$ -time. Thus, the total merge algorithm requires  $O(|E_1|k + |E_1|t)$ -time which is equal to  $O(|E_1| \cdot \max(k, t))$ .

## 14 Details Concerning Strains of E. coli K-12

Table 4 describes the accession number, sub-strain and genome length of the E.coli genomes used for validation of our construction and bubble-calling.

| Accession Number | Sub-strain | Genome Size  |
|------------------|------------|--------------|
| AP009048         | W3110      | 4,646,332 bp |
| CP009789         | ER3413     | 4,558,660 bp |
| CP010441         | ER3445     | 4,607,634 bp |
| CP010442         | ER3466     | 4,660,432 bp |
| CP010445         | ER3435     | 4,682,086 bp |
| U00096           | MG1655     | 4,641,652 bp |

Table 4. Characteristics of the substrains of E. coli K-12 used to test the performance and accuracy of VariMerge

We validate VariMerge by generating two succinct colored de Bruijn graphs with three *E. coli* assemblies each, merge them, and verify the correctness of the merged graph. First, we generated all  $k$ -mers for each reference genome, counted all unique  $k$ -mers with KMC2 Deorowicz *et al.* (2015), constructed two de Bruijn graphs of three assemblies each using Vari, and merged them into a six-color graph using VariMerge. Independently, we constructed a second colored de Bruijn graph using Vari on all six assemblies in one run and then compared these two graphs. We found VariMerge produced files on disk that were bit-for-bit identical to those generated by Vari, demonstrating they construct equivalent graphs and data structures.
